# Supplementary material
Source: HighWire-hosted journal article supplement (doi:10.1101/rna.079861.123)

**Supplementary Material for:**

**A tRNA-specific function for tRNA methyltransferase Trm10 is associated with a new tRNA quality control mechanism in *Saccharomyces cerevisiae***

Isobel E. Bowles and Jane E. Jackman

Department of Chemistry and Biochemistry, Center for RNA Biology, and Ohio State

Biochemistry Program, 484 W. 12<sup>th</sup> Avenue, Columbus, OH, 43210, USA

**Table S1. Statistical analysis of mature tRNA levels.**

| <i>S. cerevisiae</i> strain         | <i>S. cerevisiae</i> strain               | P-value <sup>a</sup><br>comparisons<br>tRNA <sup>Trp</sup> | P-value <sup>a</sup><br>comparisons<br>tRNA <sup>Gly</sup> |
|-------------------------------------|-------------------------------------------|------------------------------------------------------------|------------------------------------------------------------|
| <i>TRM10</i>                        | <i>trm10Δ</i>                             | 3.27E-07                                                   | 0.028                                                      |
| <i>TRM10</i> + 5FU                  | <i>trm10Δ</i> + 5FU                       | 0.00020                                                    | 0.031                                                      |
| <i>trm10Δ</i>                       | <i>trm10Δ</i> + 5FU                       | 0.00021                                                    | 0.069                                                      |
| <i>trm10Δ</i> + tRNA <sup>Trp</sup> | <i>trm10Δ</i> + tRNA <sup>Trp</sup> + 5FU | 0.0087                                                     | 0.12                                                       |
| <i>TRM10</i>                        | <i>trm10Δ</i> + tRNA <sup>Trp</sup>       | 0.00085                                                    | 0.28                                                       |
| <i>TRM10</i> + 5FU                  | <i>trm10Δ</i> + tRNA <sup>Trp</sup> + 5FU | 0.00043                                                    | 0.14                                                       |
| <i>trm10Δ</i>                       | <i>trm10Δ</i> + tRNA <sup>Trp</sup> + 5FU | 0.065                                                      | 0.037                                                      |
| <i>TRM10</i> + tRNA <sup>Trp</sup>  | <i>TRM10</i> + tRNA <sup>Trp</sup> + 5FU  | 0.12                                                       | 0.15                                                       |
| <i>trm10Δ</i>                       | <i>trm10Δmet22Δ</i>                       | 0.0048                                                     | 0.13                                                       |
| <i>trm10Δ</i> + 5FU                 | <i>trm10Δmet22Δ</i> + 5FU                 | 0.0019                                                     | 0.069                                                      |
| <i>trm10Δmet22Δ</i>                 | <i>trm10Δmet22Δ</i> + <i>MET22</i>        | 0.061                                                      | 0.11                                                       |
| <i>trm10Δmet22Δ</i> + 5FU           | <i>trm10Δmet22Δ</i> + <i>MET22</i> + 5FU  | 0.005                                                      | 0.16                                                       |
| <i>trm10Δ</i>                       | <i>trm10Δmet22Δ</i> + <i>MET22</i>        | 0.022                                                      | 0.061                                                      |
| <i>trm10Δ</i> + 5FU                 | <i>trm10Δmet22Δ</i> + <i>MET22</i> + 5FU  | 0.00076                                                    | 0.061                                                      |

<sup>a</sup> Listed P-values for comparisons of quantified tRNA levels in **Figure 2** and **Figure 5**. One-tailed P-values were determined by two-sample t-tests assuming equal variances and  $\leq 0.05$  was defined as a significant difference.

**Table S2. DNA oligonucleotide sequences used to probe northern membranes.**

| Northern Blot Oligo                 | Sequence                                   | Source                 |
|-------------------------------------|--------------------------------------------|------------------------|
| Mature tRNA <sup>Trp</sup> (CCA)    | ATTTGGAGTCGAAAGCTCTACCATTG                 | Swinehart et al. 2013  |
| Mature tRNA <sup>Gly</sup> (GCC)    | TGGCAACGTTGGATTTTACC                       | Swinehart et al. 2013  |
| tRNA <sup>Trp</sup> intron          | CGTGGAAATTTCCAAGATTTAATTGGAGTCGAAAGCTCTACC | Chatterjee et al. 2022 |
| tRNA <sup>Trp</sup> 5' leader (GAT) | CCATTGAGCCACCGCTTCATCTTGAAAT               | This study             |
| tRNA <sup>Trp</sup> 5' leader (GTT) | CCATTGAGCCACCGCTTCAACTTTTGTT               | This study             |
| 5S rRNA                             | CTACTCGGTCAGGCTC                           | This study             |

**Table S3. 5'-leader sequences for each annotated pre-tRNA<sup>Trp</sup> and pre-tRNA<sup>Gly</sup>(GCC) gene in *S. cerevisiae*.**

| 5'-leader Sequence <sup>a</sup> |                           |
|---------------------------------|---------------------------|
| tRNA <sup>Gly</sup> (GCC)       | tRNA <sup>Trp</sup> (CCA) |
| tcaaaagta <b>a</b>              | atttcaagat <b>t</b>       |
| caattagt <b>a</b>               | attccaagat <b>t</b>       |
| aataaagat <b>c</b>              | aataaaaagt <b>t</b>       |
| aagaaatt <b>c</b>               | aacaaaagt <b>t</b>        |
| acatgaaag <b>c</b>              | aacaatagt <b>t</b>        |
| acaatact <b>c</b>               | atttcaagat <b>t</b>       |
| taaataaca <b>a</b>              |                           |
| caagaaata <b>a</b>              |                           |
| aagattact <b>a</b>              |                           |
| agttcact <b>a</b>               |                           |
| acaattgt <b>a</b>               |                           |
| caaatagta <b>a</b>              |                           |
| aagaaaaca <b>a</b>              |                           |
| cttcaata <b>a</b>               |                           |
| taaataaca <b>a</b>              |                           |
| taatcagta <b>a</b>              |                           |

<sup>a</sup> Sequences are listed 5'-3', with the last nucleotide (highlighted in red) corresponding to the -1 nucleotide that is immediately next to the RNase P cleavage site for each pre-tRNA.

**Table S4. Comparison of 5FU-dependent and *trm10Δ*-dependent changes in individual pre-tRNA<sup>Trp</sup> species**

| Pre-tRNA           | <i>S. cerevisiae</i> strain        | + 5FU             | - 5FU | Fold-change <sup>b</sup> | <i>trm10Δ</i> | <i>TRM10</i> | Fold-change |
|--------------------|------------------------------------|-------------------|-------|--------------------------|---------------|--------------|-------------|
| Initial transcript | <i>TRM10</i> + tRNA <sup>Trp</sup> | 1.55 <sup>a</sup> | 0.05  | 31                       | 0.55          | 0.03         | 18          |
|                    | <i>TRM10</i>                       | 1.11              | 0.03  | 37                       |               |              |             |
| 3' processed       | <i>TRM10</i> + tRNA <sup>Trp</sup> | 1.93              | 0.11  | 18                       | 0.93          | 0.07         | 13          |
|                    | <i>TRM10</i>                       | 1.92              | 0.07  | 27                       |               |              |             |
| Intron-containing  | <i>TRM10</i> + tRNA <sup>Trp</sup> | 0.82              | 0.12  | 6.8                      | 0.5           | 0.06         | 8.3         |
|                    | <i>TRM10</i>                       | 0.40              | 0.06  | 6.5                      |               |              |             |

<sup>a</sup> Average abundance of indicated pre-tRNA species in each strain are listed based on quantification using intron-targeting probe (green) as reported in **Figure S1**.

<sup>b</sup> Fold-change calculated from average abundance +5FU/-5FU for each pre-tRNA in each indicated strain.

<sup>c</sup> Fold-change calculated from average abundance *trm10Δ*/*TRM10* for each pre-tRNA in each indicated strain.

**Table S5. OD<sub>600</sub> for the indicated strains at time of harvest for RNA purification.**

| Strain         | OD <sub>600</sub> |       |
|----------------|-------------------|-------|
|                | - 5FU             | + 5FU |
| <b>JJY 835</b> | 1.636             | 0.641 |
| <b>JJY 836</b> | 1.505             | 0.607 |
| <b>JJY 833</b> | 0.884             | 0.715 |
| <b>JJY 834</b> | 0.988             | 0.323 |
| <b>JJY 850</b> | 0.612             | 0.471 |
| <b>JJY 851</b> | 0.570             | 0.478 |
| <b>JJY 844</b> | 0.764             | 0.363 |
| <b>JJY 853</b> | 0.838             | 0.514 |

## SUPPLEMENTAL FIGURE LEGENDS

**Supplementary Figure 1. Northern blot replicate experiments (A)** Secondary structure depiction of mature tRNA detected by northern probes. The red line indicates hybridization of mature 5'-end radiolabeled probes (sequences listed in **Table S2**). **(B)** Northern analysis of RNA derived from the indicated strains using 5'-biotinylated probes (**Table S2**) and visualized with chemiluminescence with RNA from the same strains depicted in **Figure 2A**. The 5' biotinylated probe binds at the same location as the radiolabeled probe depicted in panel A. **(C)** Northern analysis of RNA derived from the indicated strains probed for mature tRNA<sup>Trp</sup>, mature tRNA<sup>Gly</sup> and 5S rRNA, which were all detected using 5' radiolabeled probes (**Table S2**). This northern blot is a replicate experiment probed at a different exposure level from that depicted in **Figure 5A**.

**Supplementary Figure 2. *trm10Δ*- and 5FU- dependent changes to tRNA<sup>Trp</sup> precursor levels for individual intermediates in pre-tRNA processing.** Quantification of northern analysis for each individual pre-tRNA and mature tRNA species as shown in **Figure 3**. Relative RNA levels, calculated from normalized abundance for each RNA compared to 5S rRNA are shown for **(A)** initial transcript, **(B)** 3'-processed pre-tRNA<sup>Trp</sup>, **(C)** fully end-processed intron-containing tRNA<sup>Trp</sup>, and **(D)** mature tRNA<sup>Trp</sup>. Observed intensities for each species were normalized to the amount of pre-tRNA<sup>Trp</sup> in the *trm10Δ* +tRNA<sup>Trp</sup> overexpressing strain (**Figure 3B**, lane 5) to allow the full spectrum of increases and decreases in pre-tRNA abundance to be visualized. Note that the 5'-leader probes do not hybridize efficiently to mature tRNA<sup>Trp</sup> due to presence of the m<sup>1</sup>G9 modification in the target region for each oligonucleotide probe, therefore leading to no signal for this species in *TRM10*-derived RNA. Colors to indicate quantification with each pre-tRNA-targeting probe correspond to the diagram in **Figure 3A**.

**Supplementary Figure 3. Expression of *MET22* from a plasmid does not revert the *met22Δ* rescue of 5FU-resistant growth in *trm10Δ* strains.** Strains were grown overnight in SD-Ura media if containing the [p*MET22*] *CEN URA3* plasmid or in SD-Leu if only containing the 2μ *LEU2* tRNA overexpression vector. A “–” symbol indicates no *MET22 CEN URA3* plasmid is present, and *MET22* is genomically expressed if not indicated as *met22Δ*. Strains were serially 4-fold diluted from a starting OD<sub>600</sub> of 1, plated on SD-Leu plates with indicated concentrations of 5FU, and incubated for 4 days at 30°C.

**Supplementary Figure 4. tRNA<sup>Trp</sup> precursor levels along each step of pre-tRNA processing for the *trm10Δmet22Δ* strain. (A)** Northern analysis using each of the three individual pre-tRNA targeting probes shown in **Figure 3**. **(B-D)** Quantification of individual pre-tRNA<sup>Trp</sup> levels from strains shown in (A) hybridized by the indicated pre-tRNA probes. Relative tRNA levels were calculated by comparing the observed intensity for each indicated RNA to the normalized abundance observed in the *trm10Δmet22Δ* strain with *met22* complementation (lane 7) set to 1.

Figure S1

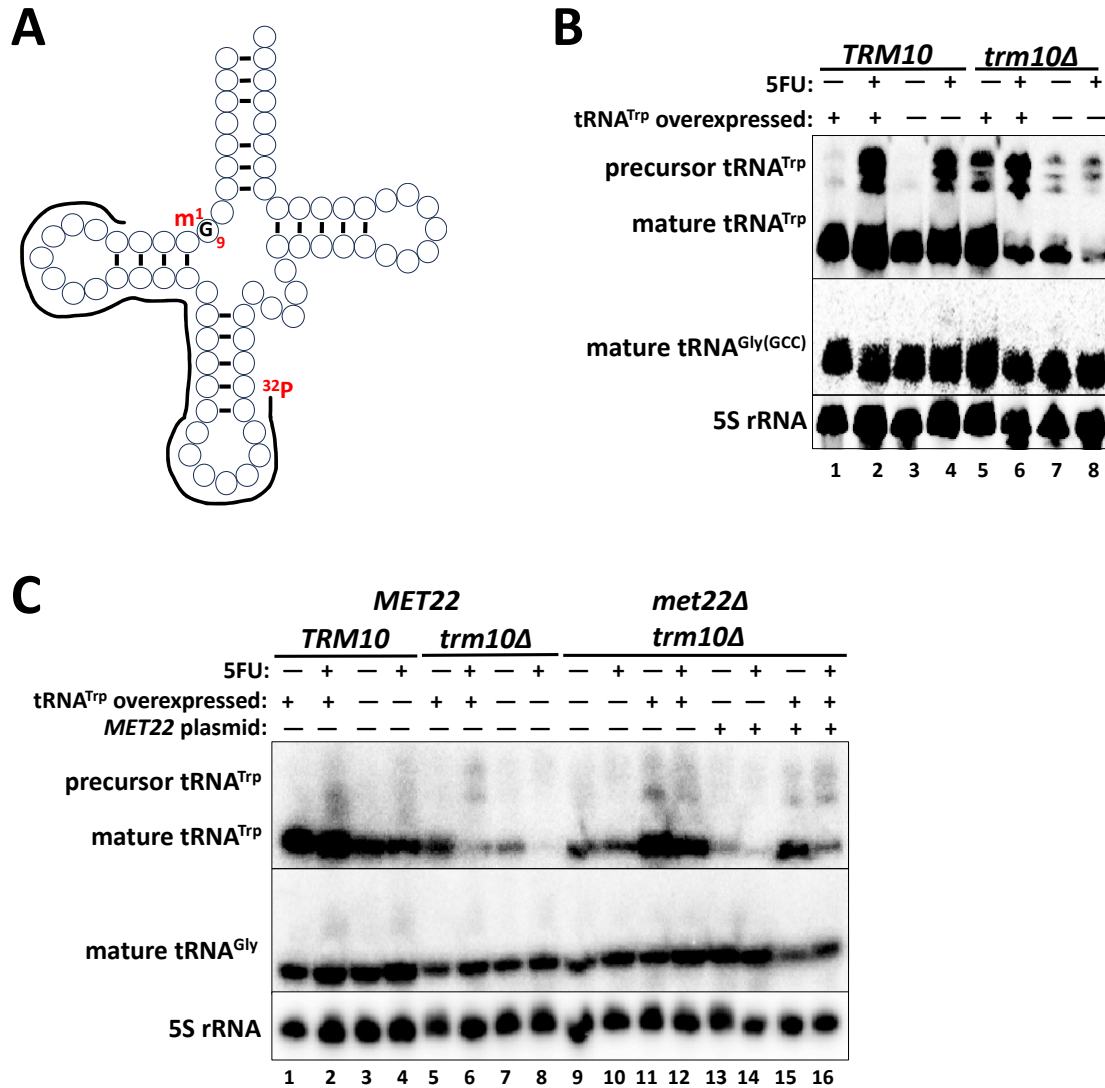

Figure S2

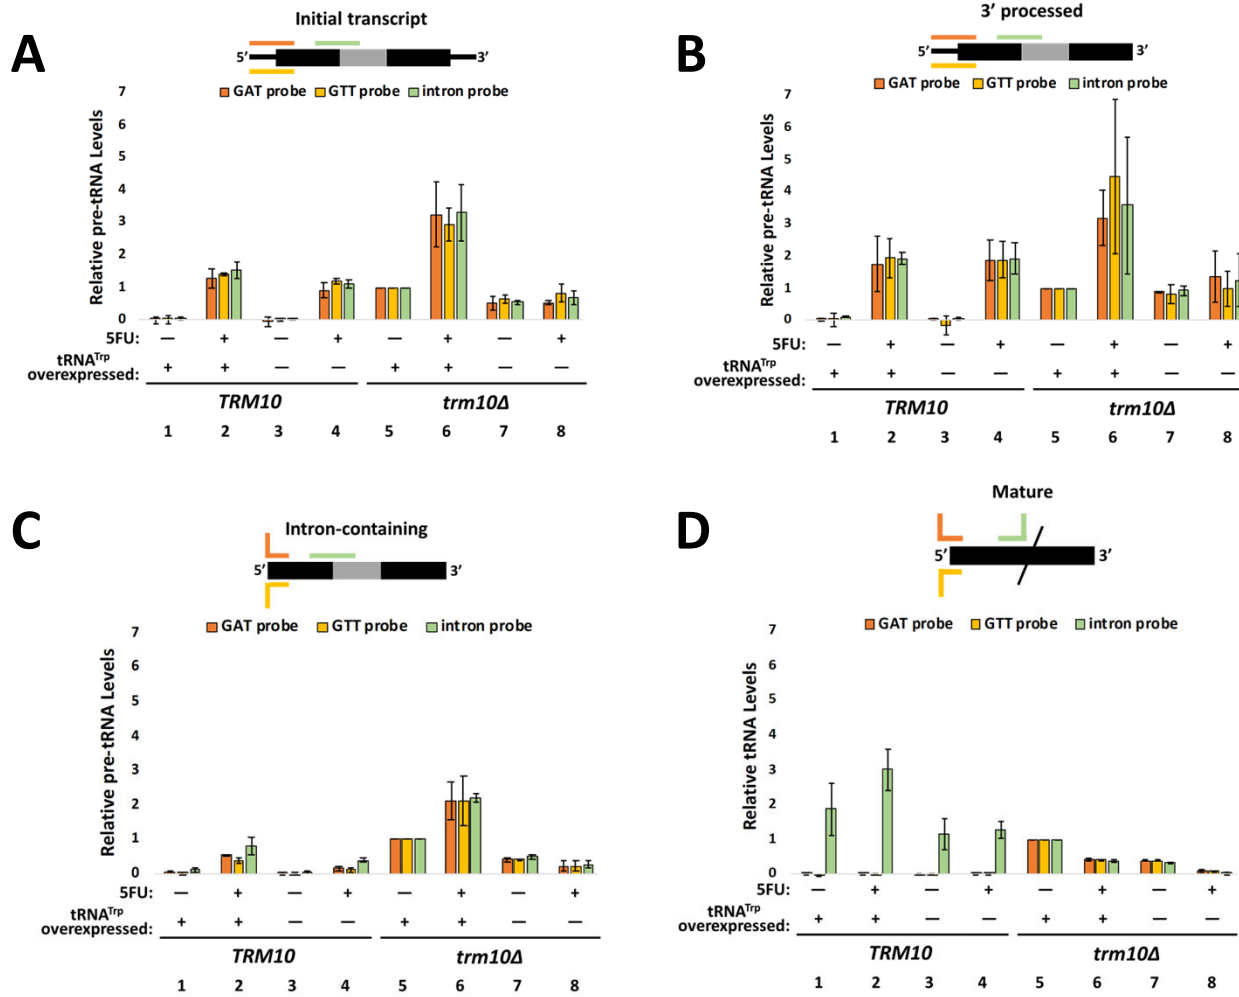

Figure S3

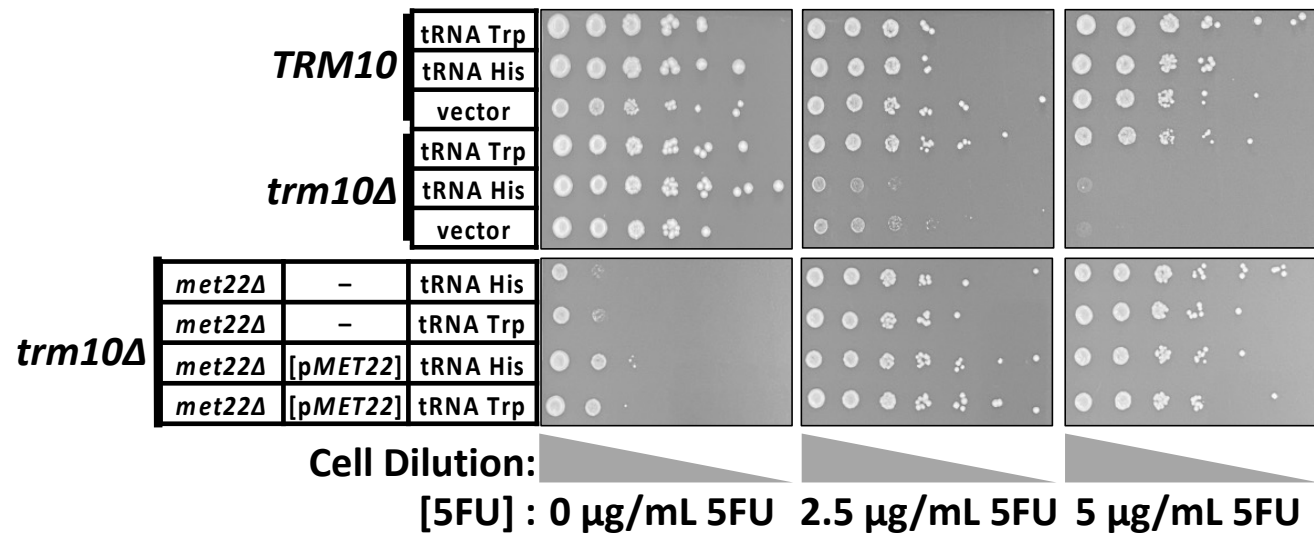

Figure S4

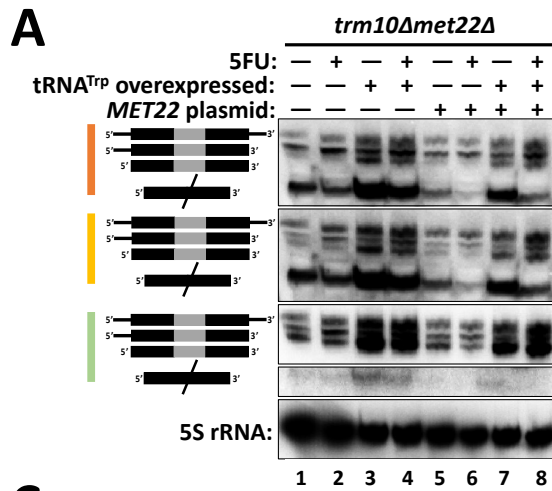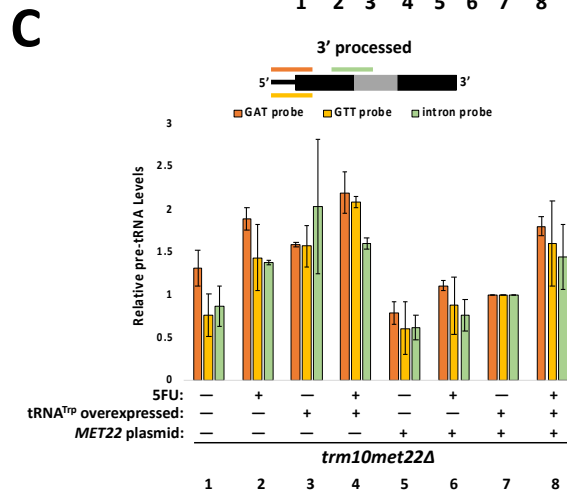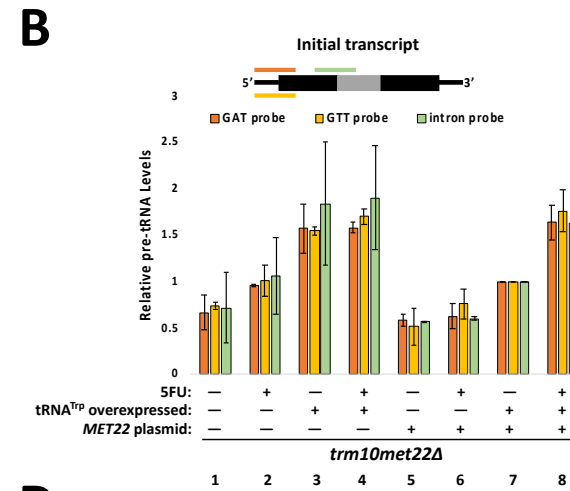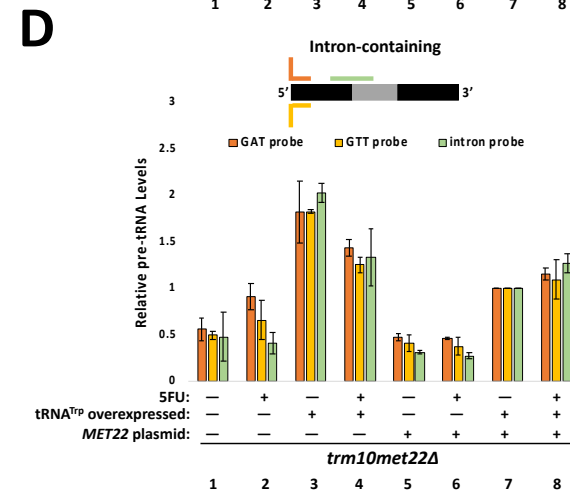

Supplement: Supplemental_Material.pdf [file Supplemental_Material.pdf]
